# Supplementary material
Source: publisher site journal article supplement (http://www.kjim.org/upload/media/kjim-2020-322-suppl3.pdf)
Supplement: Supplementary file 1 [file kjim-2020-322-suppl3.pdf]

**Supplementary Table 3. The number of claims for emergency department visits and outpatient visits due to gout per 100,000 persons**

|                   | 2010     | 2011     | 2012     | 2013     | 2014     | 2015     | 2016     | 2017     | $\rho$ for trend |
|-------------------|----------|----------|----------|----------|----------|----------|----------|----------|------------------|
| ED visit          |          |          |          |          |          |          |          |          |                  |
| Overall           | 6.98     | 8.58     | 10.23    | 12.54    | 14.26    | 15.34    | 26.7     | 31.77    | < 0.001          |
| Sex               |          |          |          |          |          |          |          |          |                  |
| Male              | 13.26    | 16.2     | 19.46    | 23.88    | 27.47    | 29.65    | 51.95    | 62.01    | < 0.001          |
| Female            | 0.86     | 1.15     | 1.21     | 1.45     | 1.33     | 1.32     | 1.99     | 2.13     | 0.009            |
| Age group, yr     |          |          |          |          |          |          |          |          |                  |
| 20–29             | 3.13     | 4.03     | 4.69     | 5.55     | 6.28     | 6.32     | 10.05    | 11.84    | < 0.001          |
| 30–39             | 7        | 9.53     | 11.84    | 15.97    | 19.07    | 22.2     | 36.79    | 44.41    | < 0.001          |
| 40–49             | 8.05     | 9.82     | 11.05    | 13.93    | 18.54    | 16.98    | 32.58    | 41.9     | 0.001            |
| 50–59             | 7.61     | 8.79     | 12.69    | 13.35    | 12.91    | 15.8     | 28.94    | 34.81    | 0.001            |
| 60–69             | 8.06     | 9.27     | 8.93     | 12.11    | 13.42    | 14.94    | 23.41    | 24.6     | 0.001            |
| ≥ 70              | 9.52     | 10.74    | 11.12    | 12.96    | 12.33    | 13.3     | 22.93    | 24.93    | 0.001            |
| Outpatient visits |          |          |          |          |          |          |          |          |                  |
| Overall           | 2,441.9  | 2,597.83 | 3,059.57 | 3,276.86 | 3,342.42 | 3,551.94 | 3,823.47 | 3,930.2  | < 0.001          |
| Sex               |          |          |          |          |          |          |          |          |                  |
| Male              | 4,653.09 | 4,962.94 | 5,844.74 | 6,257.76 | 6,382.89 | 6,801.57 | 7,313.82 | 7,528.57 | < 0.001          |
| Female            | 285.65   | 290.14   | 350.39   | 364.04   | 368.03   | 369.99   | 403.71   | 403.56   | 0.001            |
| Age group, yr     |          |          |          |          |          |          |          |          |                  |
| 20–29             | 464.03   | 518.8    | 654.09   | 737.02   | 794.7    | 880.69   | 1,021.21 | 1,128.79 | < 0.001          |
| 30–39             | 1,493.95 | 1,676.16 | 2,091.33 | 2,392.04 | 2,583.97 | 2,922.66 | 3,314.57 | 3,652.5  | < 0.001          |
| 40–49             | 2,407.33 | 2,545.97 | 3,047.51 | 3,254.87 | 3,361.96 | 3,638.99 | 3,992.67 | 4,207.54 | < 0.001          |
| 50–59             | 3,481.21 | 3,584.63 | 4,059.35 | 4,234    | 4,147.25 | 4,249    | 4,499.35 | 4,509.29 | 0.001            |
| 60–69             | 4,521.83 | 4,623.93 | 5,198.93 | 5,268.96 | 5,197.81 | 5,335.37 | 5,462.25 | 5,287.12 | 0.018            |
| ≥ 70              | 4,297.54 | 4,409.96 | 4,965.54 | 5,195.04 | 5,141.05 | 5,244.17 | 5,370.52 | 5,255.22 | 0.004            |

$\rho$  for trend was analyzed using the Mann-Kendall trend test.

ED, emergency department.
